# Supplementary material
Source: MDPI journal article supplement (https://www.mdpi.com/2673-9992/14/1/4)

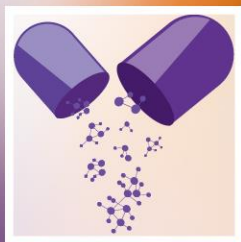

# The 8th International Electronic Conference on Medicinal Chemistry (ECMC 2022)

01-30 NOVEMBER 2022 | ONLINE

## Thiazolopyrimidine as a Promising Anticancer Pharmacophore: *In Silico* Drug Design, Molecular Docking and ADMET Prediction Studies

Chaired by **DR. ALFREDO BERZAL-HERRANZ**;  
Co-Chaired by **PROF. DR. MARIA EMÍLIA SOUSA**

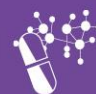

pharmaceuticals

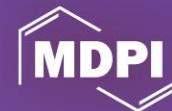

**Omar A. El-Khouly<sup>1,2\*</sup>, Dina I. A. Othman<sup>1</sup>, Amany S. Mostafa<sup>1</sup>, Mohammed A. M. Massoud<sup>1</sup>.**

<sup>1</sup> Department of Pharmaceutical Organic Chemistry, Faculty of Pharmacy, Mansoura University, Mansoura, 35516, Egypt.

<sup>2</sup> Faculty of Pharmacy, New Mansoura University, New Mansoura, Egypt.

\* Corresponding author: [omar.elkhouly@nmu.edu.eg](mailto:omar.elkhouly@nmu.edu.eg)

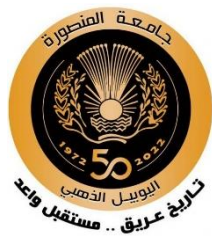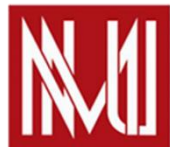

New  
Mansoura  
University

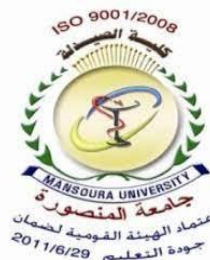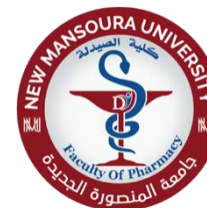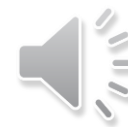

# Thiazolopyrimidine as a Promising Anticancer Pharmacophore: *In Silico* Drug Design, Molecular Docking and ADMET Prediction Studies

## Graphical Abstract

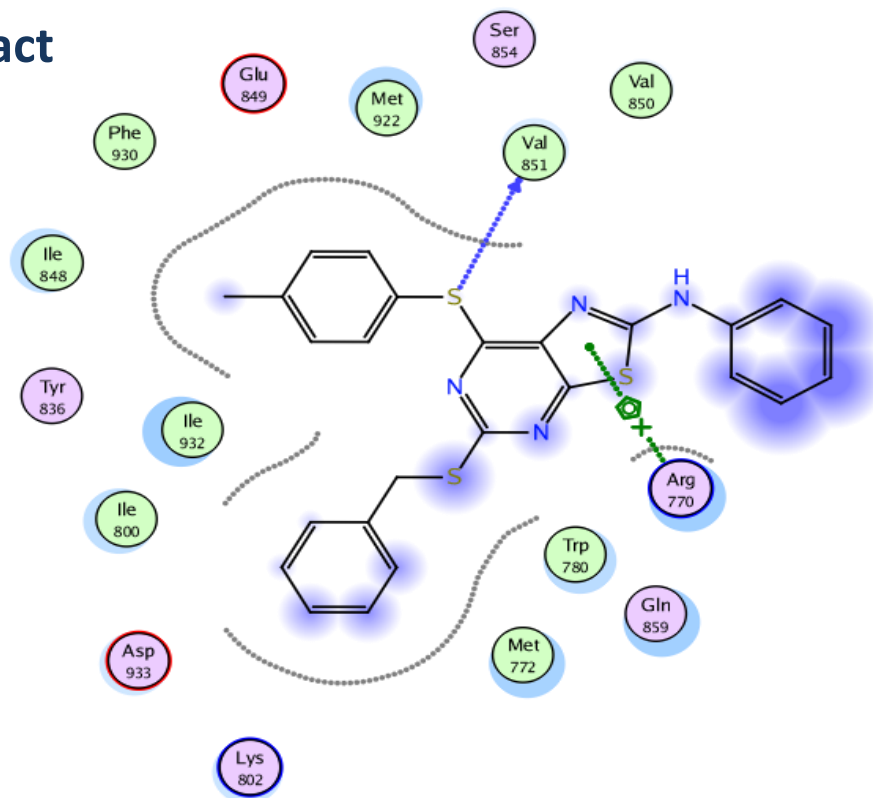

Interaction of Compound 7 with PI3K

ECMC  
2022

The 8th International Electronic  
Conference on Medicinal Chemistry

01-30 NOVEMBER 2022 | ONLINE

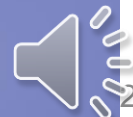

## **Abstract:**

Thiazolopyrimidines are designed to act as bio-isosteric analogues of purine nucleus. They proved to show a wide range of biological activities; such as anticancer, anti-inflammatory, antifungal, antiviral and antitubercular activity.

In this study, a literature survey was performed to elect the most active thiazolopyrimidine-containing scaffolds; acting as anticancer agents; to be subjected to extensive computational studies in order to explore the possible credible mode of their anticancer activity. First, drug-likeness was investigated for the most active derivatives, followed by molecular docking study against CDK, VEGFR and PI3K enzymes to assess their binding energy and propose the mode of action. Then, contact preference and surface mapping studies were carried out to explain the presence of remarkable affinity of certain analogues towards a specific enzyme, in addition to providing more information about their activity. Finally, physicochemical properties, Lipinski's rule and ADMET prediction studies were applied to predict the best route of administration and to suggest the pharmacokinetics of the most promising candidates.

**Keywords:** Thiazolopyrimidines, Anticancer , ADMET prediction, computational studies, molecular docking.

ECMC  
2022

The 8th International Electronic  
Conference on Medicinal Chemistry  
01-30 NOVEMBER 2022 | ONLINE

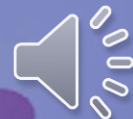

# Introduction:

## *In silico* drug design goals

- Understanding Drug-receptor interaction .
- Discovery of potential new lead compound.
- Optimization the activity of the new lead derivative .
- Save time and money.
- Less trial and error .

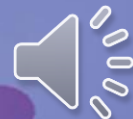

# Introduction:

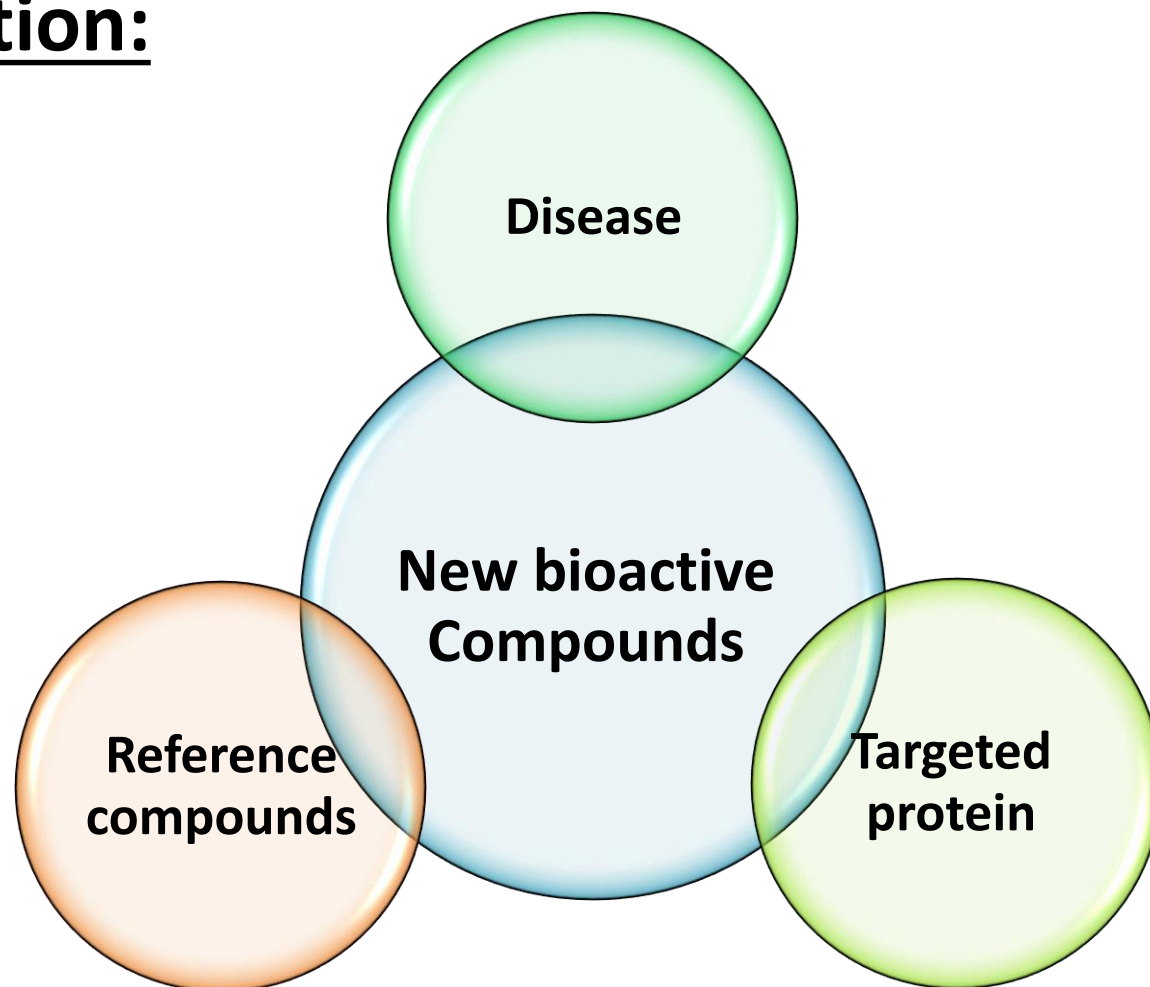

**ECMC  
2022**

**The 8th International Electronic  
Conference on Medicinal Chemistry**

01-30 NOVEMBER 2022 | ONLINE

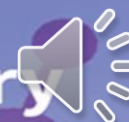

# Introduction:

## The disease is Cancer

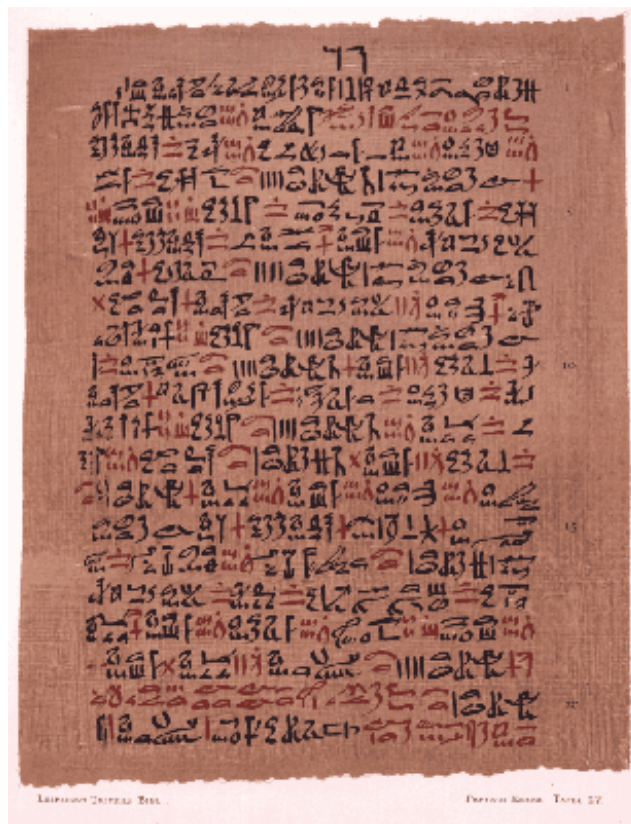

a) R.L. Siegel *et al*/ CA. Cancer J. Clin. 71 (2021) 7

ECMC  
2022

The 8th International Electronic  
Conference on Medicinal Chemistry

01-30 NOVEMBER 2022 | ONLINE



# Cancer Treatments

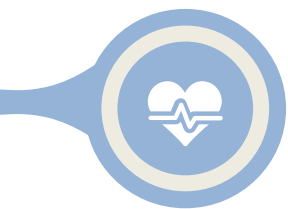

**Surgery**

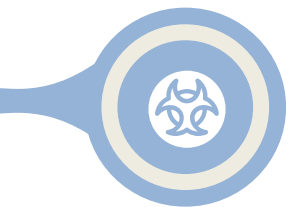

**Radiation therapy**

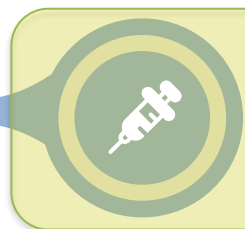

**Chemotherapy**

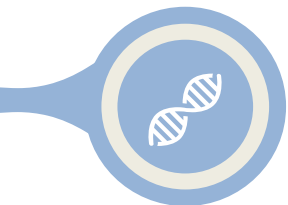

**Immunotherapy**

**Hormonal therapy**

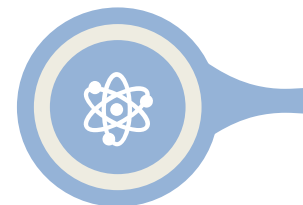

**Stem cells transplant**

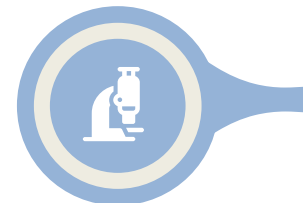

**Precision Medicine**

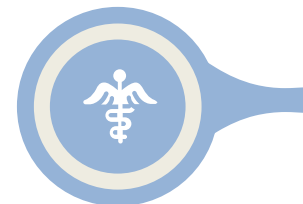

**ECMC  
2022**

**The 8th International Electronic  
Conference on Medicinal Chemistry**

01-30 NOVEMBER 2022 | ONLINE



# The Reference Compounds (Thiazolo[4,5-d]pyrimidines)

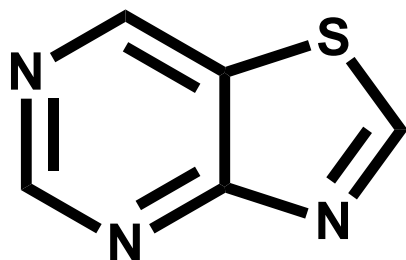

Thiazolo[4,5-d]pyrimidines

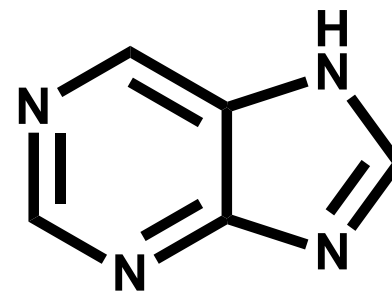

Purine

a) B. Kuppast *et.al*/ Eur J Med Chem 4 (2016)

ECMC  
2022

The 8th International Electronic  
Conference on Medicinal Chemistry  
01-30 NOVEMBER 2022 | ONLINE

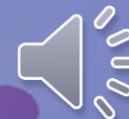



# The Reference Compounds: Thiazolo[4,5-d]pyrimidines

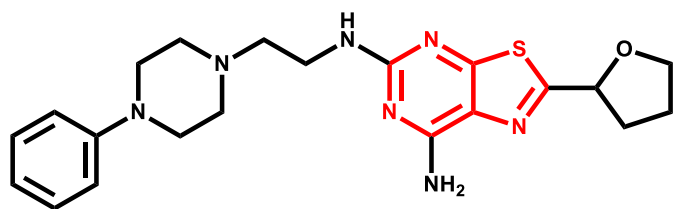

1(a)

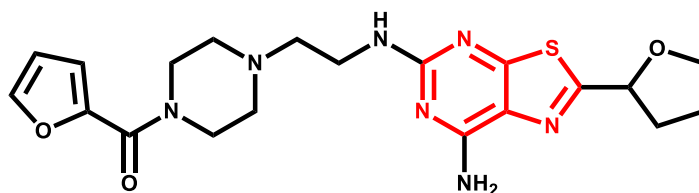

2(a)

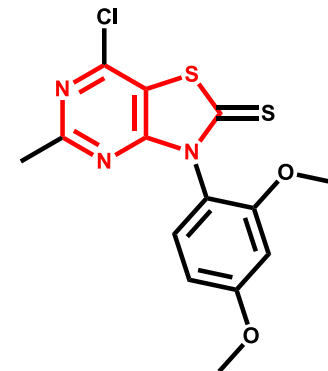

3(b)

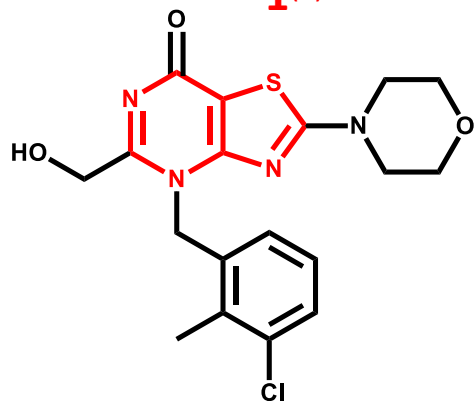

4(c)

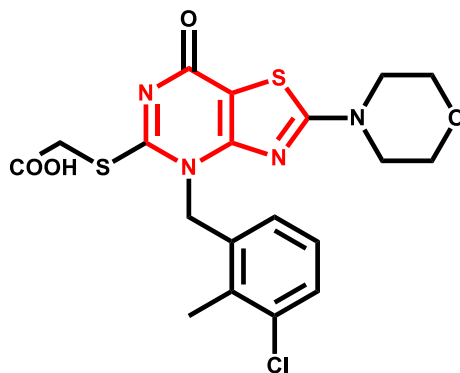

5(c)

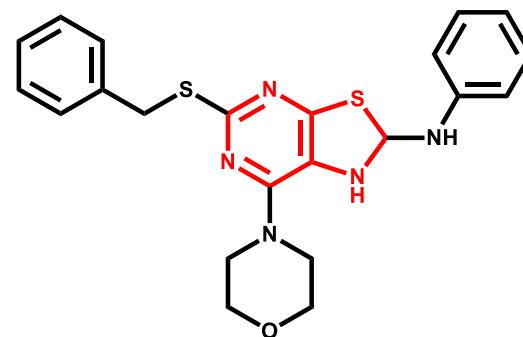

6(d)

a) F Varano *et.al* Pharmaceuticals 13 (8) (2020)

b) S. Mohamed *et.al* bioorg med chem J. 28 (17) (2020)

c) H. Lin *et.al* Med Chem Lett 3 (2012)

d) Z.-H. Li *et.al* EJ Med Chem. (135) (2017)

ECMC  
2022

The 8th International Electronic  
Conference on Medicinal Chemistry  
01-30 NOVEMBER 2022 | ONLINE

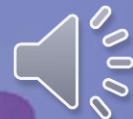

# The Reference Compounds: Thiazolo[4,5-d]pyrimidines

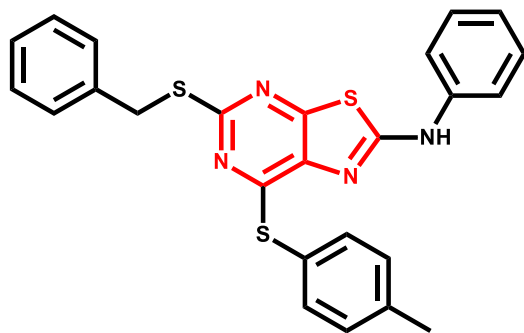

7(a)

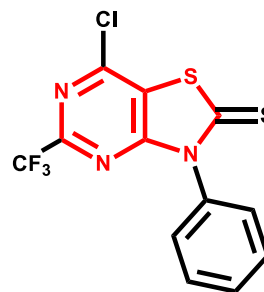

8(b)

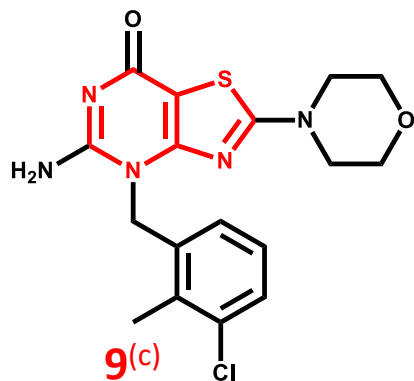

9(c)

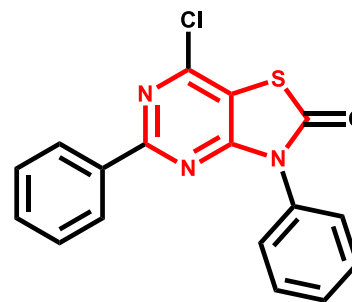

10(d)

- a) Z.-H. Li *et al*/ EJ Med Chem. (138) (2017)  
b) L. Becan *et al*/ Pharmaceuticals 15, 92 (2022)

- c) H. Lin *et al* Med Chem Lett 3 (2012)  
d) L. Becan *et al*/ Med Chem Res (2013)



# Targeted Protein

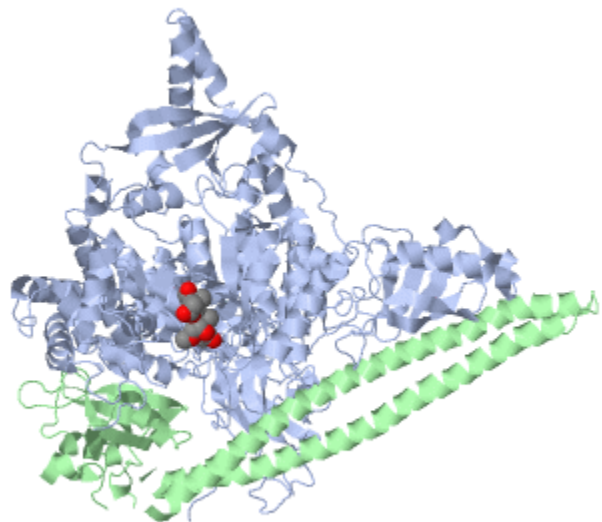

Jmol

**PI3K(a)**

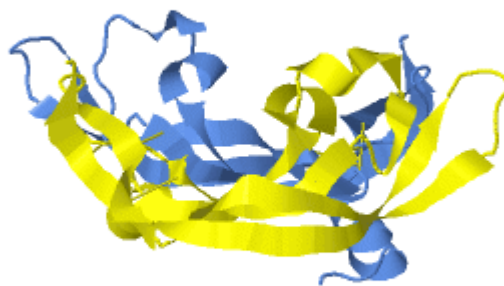

Jmol

**VEGFR-2(B)**

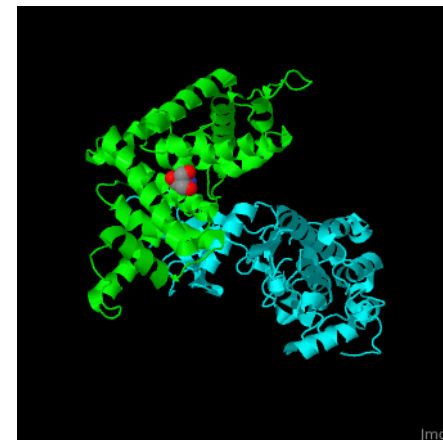

Jmol

**CDK-1(C)**

a) P. Furet *et al*/ Bioorg. Med. Chem. Lett. 23 (2013)

b) K. Okamoto Li *et al*/ ACS Med. Chem. Lett. 6 (2015)

c) E. Schneider *et al*/ PNAS 110 (2013)

**ECMC  
2022**

**The 8th International Electronic  
Conference on Medicinal Chemistry**  
01-30 NOVEMBER 2022 | ONLINE



# Aim of the study

- It is a preliminary study to review the pre-synthesized thiazolo[4,5-d] pyrimidines derivatives as anticancer agents.
- The reported anticancer compounds will be selected and assessed computationally by molecular docking study against PI3K, VEGFR-2, CDK1 enzymes to suggest their mechanism of action.
- Also, contact preference and surface mapping studies will be done to support the results.
- Finally, drug likeness and physicochemical properties will be predicted to suggest the best route of administration and the pharmacokinetics of the most promising candidates.



# Results and discussion

## 1. Molecular Docking Study

1. The first study that showed the complex between **PI3K $\alpha$**  and **Alpelisib** selected as the docking model (PDB code: 4JPS)<sup>(a)</sup>
  2. The second study showed the complex between **VEGFR-2** and **Sorafenib** selected as the docking model (PDB code: 3WZE)<sup>(b)</sup>
  3. The third study showed the complex between **CDK1** and **compound A** selected as the docking model (PDB code: 4F7N)<sup>(c)</sup>
- Docking interaction energy (kcal/mol) is shown in the next table.

a) P. Furet *et al*/ Bioorg. Med. Chem. Lett. 23 (2013)

b) K. Okamoto Li *et al*/ ACS Med. Chem. Lett. 6 (2015)

c) E. Schneider *et al*/ PNAS 110 (2013)

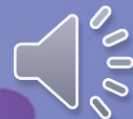

| Compound<br>No. | Docking interaction energy (kcal/mol) |         |        |
|-----------------|---------------------------------------|---------|--------|
|                 | PI3K                                  | VEGFR-2 | CDK1   |
| 1               | - 7.27                                | - 8.61  | - 5.99 |
| 2               | - 7.42                                | - 8.27  | - 6.56 |
| 3               | - 6.21                                | - 6.13  | - 5.85 |
| 4               | - 4.80                                | - 6.34  | - 6.87 |
| 5               | - 6.84                                | - 7.79  | - 7.25 |
| 6               | - 7.96                                | - 7.36  | - 6.76 |
| 7               | - 8.71                                | - 7.24  | - 6.97 |
| 8               | - 5.97                                | - 5.20  | - 5.35 |
| 9               | - 6.25                                | - 6.56  | - 6.70 |
| 10              | - 7.02                                | - 5.63  | - 6.05 |
| Alpelisib       | - 8.10                                | NA      | NA     |
| Sorafenib       | NA                                    | - 8.1   | NA     |
| Compound A      | NA                                    | NA      | - 9.61 |

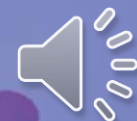

## 2D interaction with PI3K

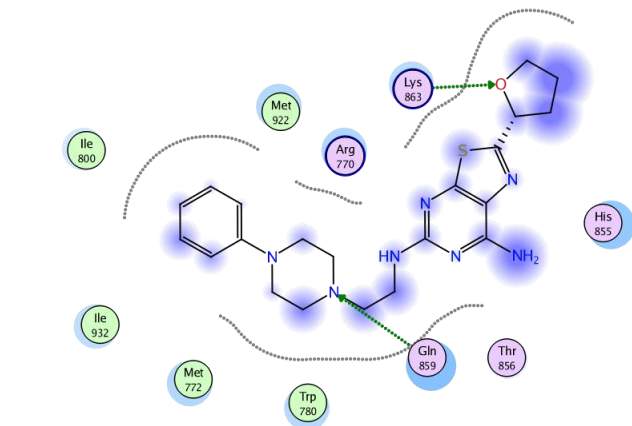

1

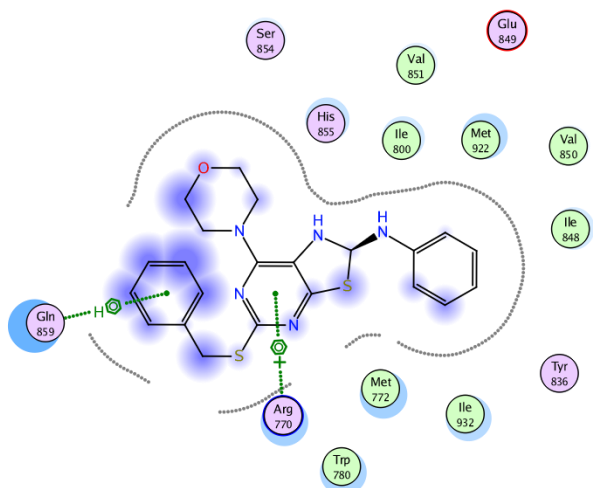

6

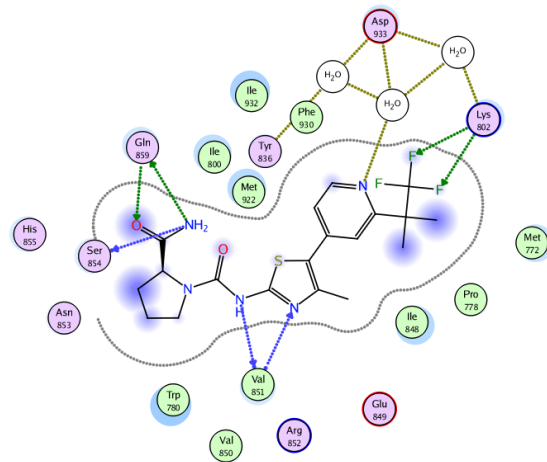

Alpelisib

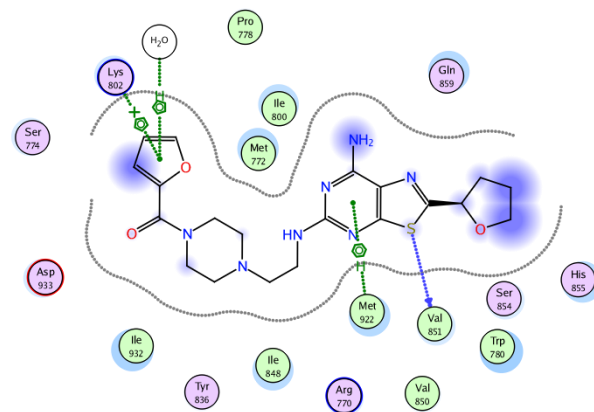

2

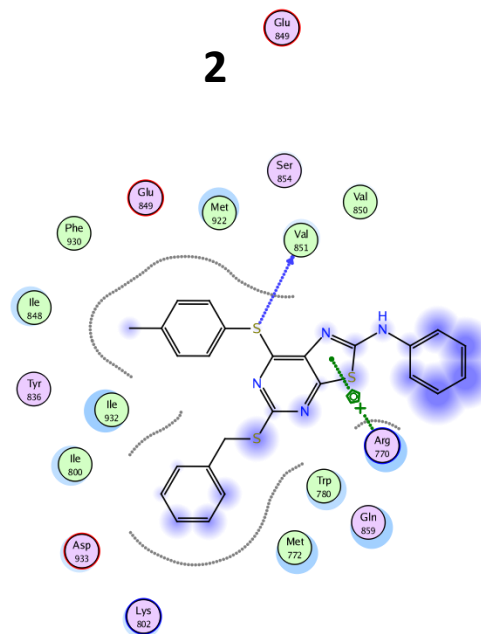

7

ECMC  
2022

The 8th International Electronic  
Conference on Medicinal Chemistry  
01-30 NOVEMBER 2022 | ONLINE



## 2D interaction with VEDFR-2

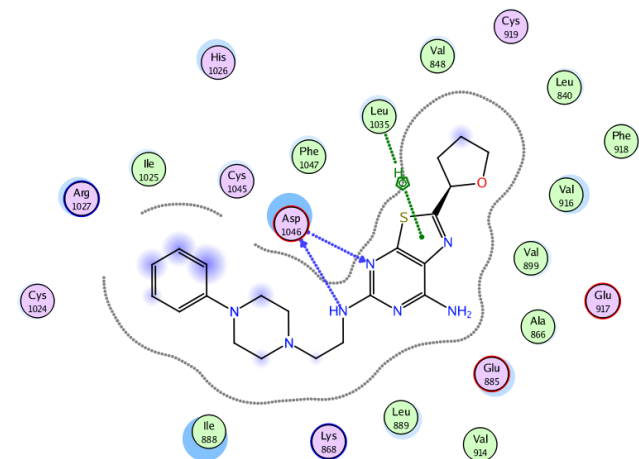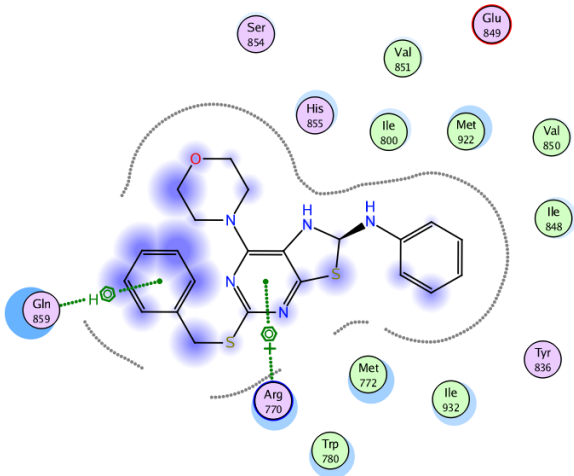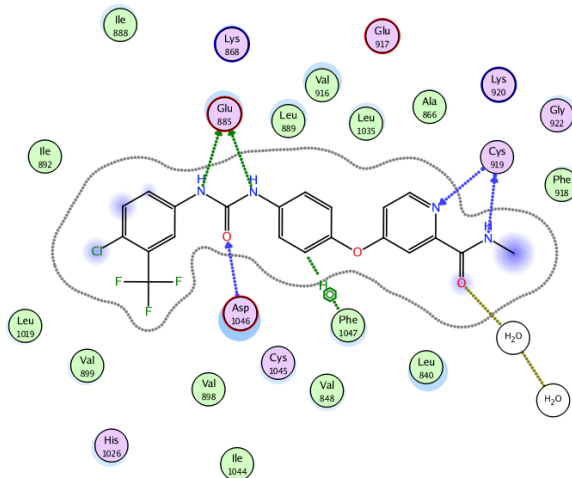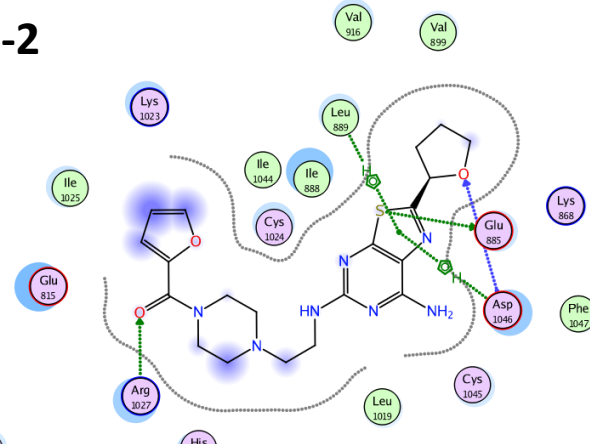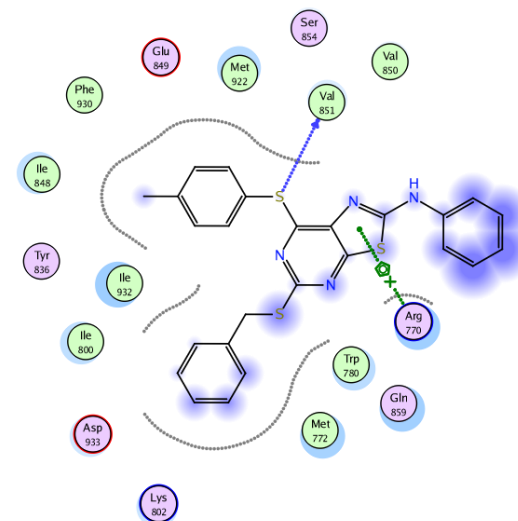



## 2D interaction with CDK1

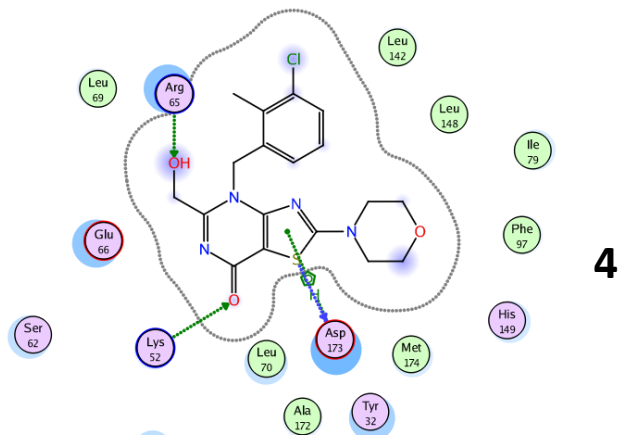

4

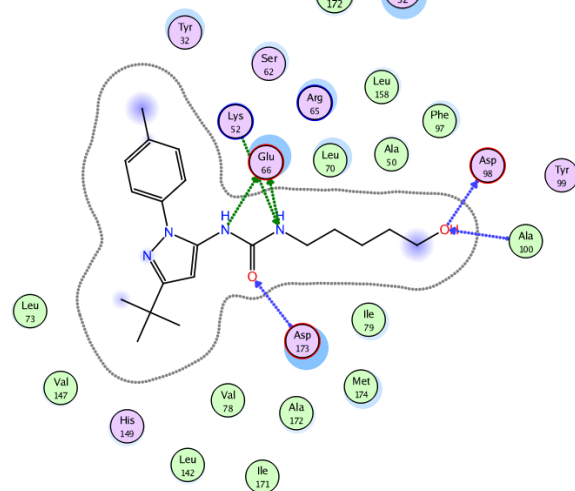

Comp A

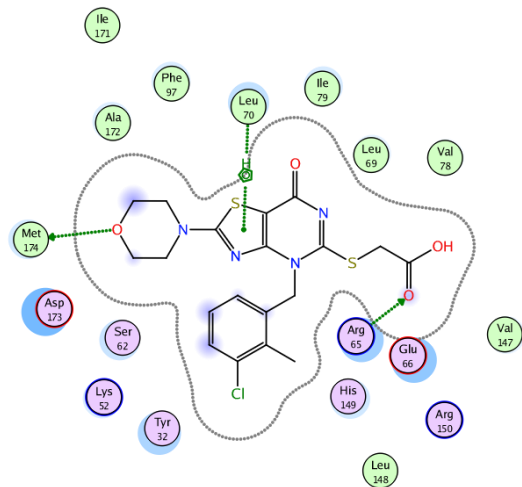

5

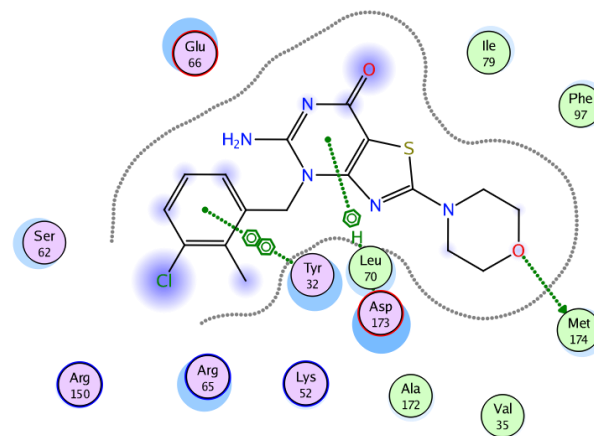

9

ECMC  
2022

The 8th International Electronic  
Conference on Medicinal Chemistry  
01-30 NOVEMBER 2022 | ONLINE



## Results and discussion

### 2. Surface Mapping

Surface mapping is a second evaluation phase that confirms that binders of the most active chemicals, comparable to those of the PI3K and VEGFR-2 enzymes



## Surface Mapping

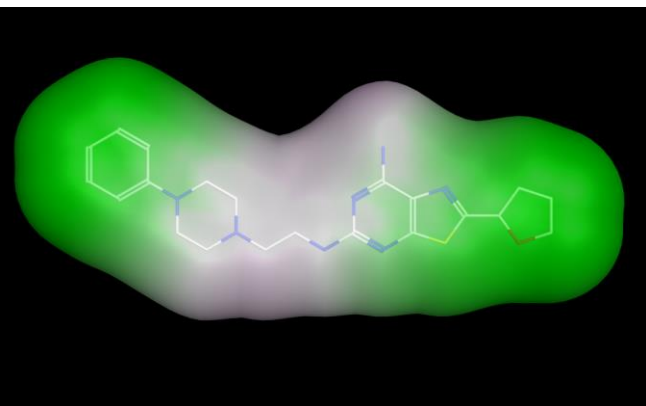

1

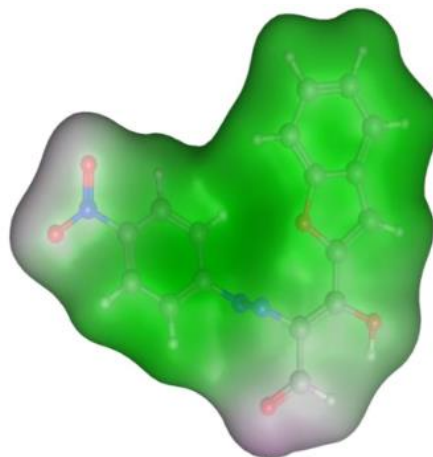

2

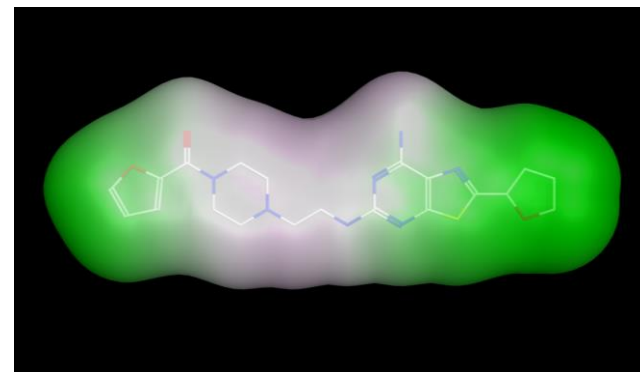

6

## Alpelisib

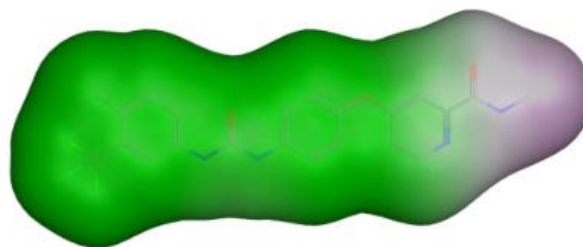

## Sorafenib

Pink: hydrophilic,  
White: neutral,  
Green: hydrophobic.

7

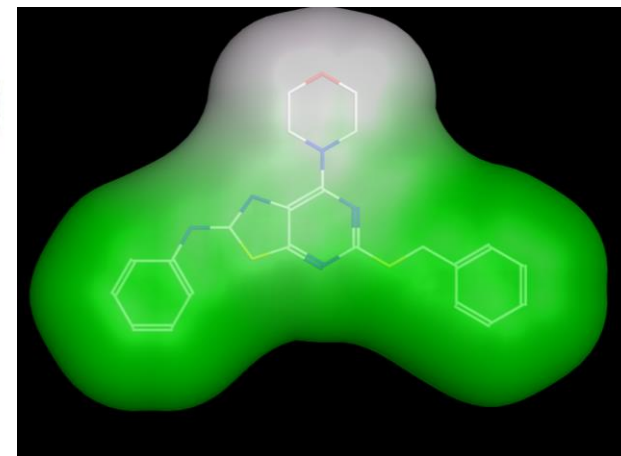

ECMC  
2022

The 8th International Electronic  
Conference on Medicinal Chemistry  
01-30 NOVEMBER 2022 | ONLINE



## Results and discussion

### 3. Contact Preference

- Contact statistics application aim is to calculate, from the 3D atomic coordinates of ligand, the best positions for hydrophobic and hydrophilic ligand atoms.
- Moreover, it includes the interactions between the chemical components of the ligands and the protein microenvironment surrounding them.



## Contact Preference

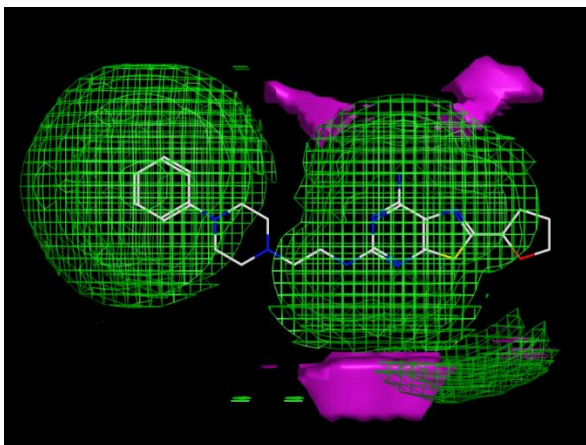

1

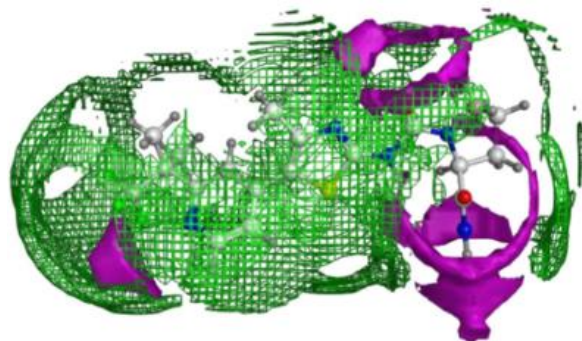

2

Alpelisib

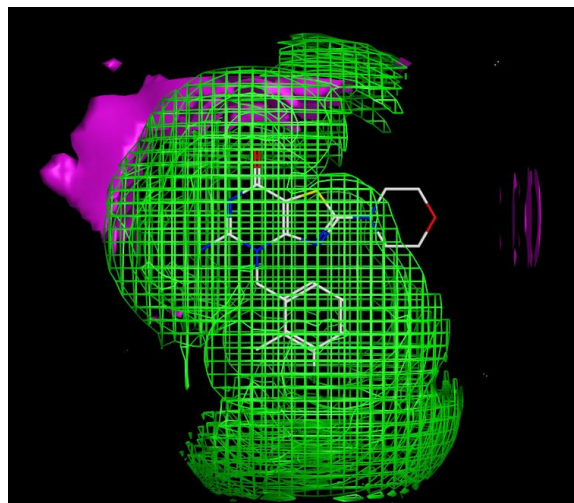

6

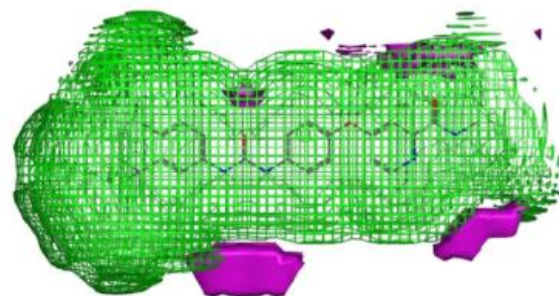

Sorafenib

Hydrophobic: green,  
Hydrophilic: purple

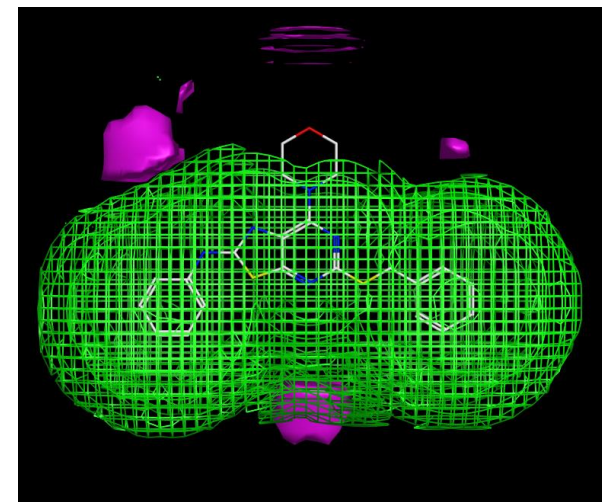

7

ECMC  
2022

The 8th International Electronic  
Conference on Medicinal Chemistry  
01-30 NOVEMBER 2022 | ONLINE

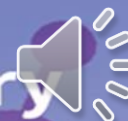

## Results and discussion

### 4. Drug likeness, physicochemical properties, Lipinski's rule and ADMET prediction

- The drug-likeness of a compound is a key criterion in screening drug candidates towards drug targets in living beings.
- The pharmaceutical activity of a drug in humans is evaluated using a set of guidelines, known as Lipinski's rule of five (RO5).
- According to Lipinski's RO5, a compound possesses good permeability across the cell membrane if log P value does not exceed five, the number of hydrogen bond donors and acceptors does not exceed 5 and 10 respectively, and the molecular mass should be less than 500 g/mol.
- To be an orally active drug, a compound should have good agreement with Lipinski's rule

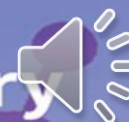

| Comp. No. | Log S <sup>a</sup> | TPSA <sup>b</sup> | MW <sup>c</sup> | M log P <sup>d</sup> | nRB <sup>e</sup> | nHBA <sup>f</sup> | nHBD <sup>g</sup> | nVio <sup>h</sup> |
|-----------|--------------------|-------------------|-----------------|----------------------|------------------|-------------------|-------------------|-------------------|
| 1         | -4.22              | 120               | 425.55          | 3.66                 | 6                | 5                 | 2                 | 0                 |
| 2         | -3.43              | 150.88            | 433.52          | 3.43                 | 7                | 7                 | 2                 | 0                 |
| 4         | -4.08              | 108               | 406.89          | 2.78                 | 4                | 5                 | 1                 | 0                 |
| 5         | -5.03              | 151               | 466.96          | 3.03                 | 6                | 6                 | 1                 | 0                 |
| 6         | -5.86              | 112.9             | 437.58          | 3.64                 | 6                | 3                 | 2                 | 0                 |
| 7         | -7.95              | 129               | 472.65          | 4.91                 | 7                | 3                 | 1                 | 1                 |
| 9         | -4.12              | 114.51            | 391.88          | 1.97                 | 3                | 4                 | 1                 | 0                 |
| Alpelisib | -4.42              | 129               | 441.5           | 2.95                 | 4                | 8                 | 2                 | 0                 |

<sup>a</sup> Solubility parameter, <sup>b</sup> Topological polar surface area (Å<sup>2</sup>)., <sup>c</sup> Molecular weight (g/mol), <sup>d</sup> Lipophilicity parameter, <sup>e</sup> Number of rotatable bond, <sup>f</sup> Number of hydrogen bond acceptors, <sup>g</sup> Number of hydrogen bond donor, <sup>h</sup> Number of violations to Lipinski's rule of five.

ECMC  
2022

The 8th International Electronic  
Conference on Medicinal Chemistry  
01-30 NOVEMBER 2022 | ONLINE

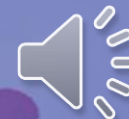

## Conclusions

- Bulk substitution at pyrimidine ring can significantly increase the activity.
- Substitution at position 2 on thiazole can increase binding activity with PI3K, VEGFR-2 and CKD1.
- All selected compounds showed a good explanation for their binding through their surface mapping and contact preference studies.
- In drug likeness study, compounds 1,2,4,5,6,7 and 9 had good drug-likeness with acceptable physicochemical properties and can be taken orally.





Thank  
you



ECMC  
2022

The 8th International Electronic  
Conference on Medicinal Chemistry  
01-30 NOVEMBER 2022 | ONLINE



Supplement: s1 [file s1]
